# Supplementary material for: Development of a new comprehensive and reliable endometrial receptivity map (ER Map/ER Grade) based on RT-qPCR gene expression analysis
Source: Oxford University Press journal article supplement (doi:10.1093/humrep/dex370), 2017-12-01
Supplement: dex370suppl_figure1.pdf [file dex370suppl_figure1.pdf]

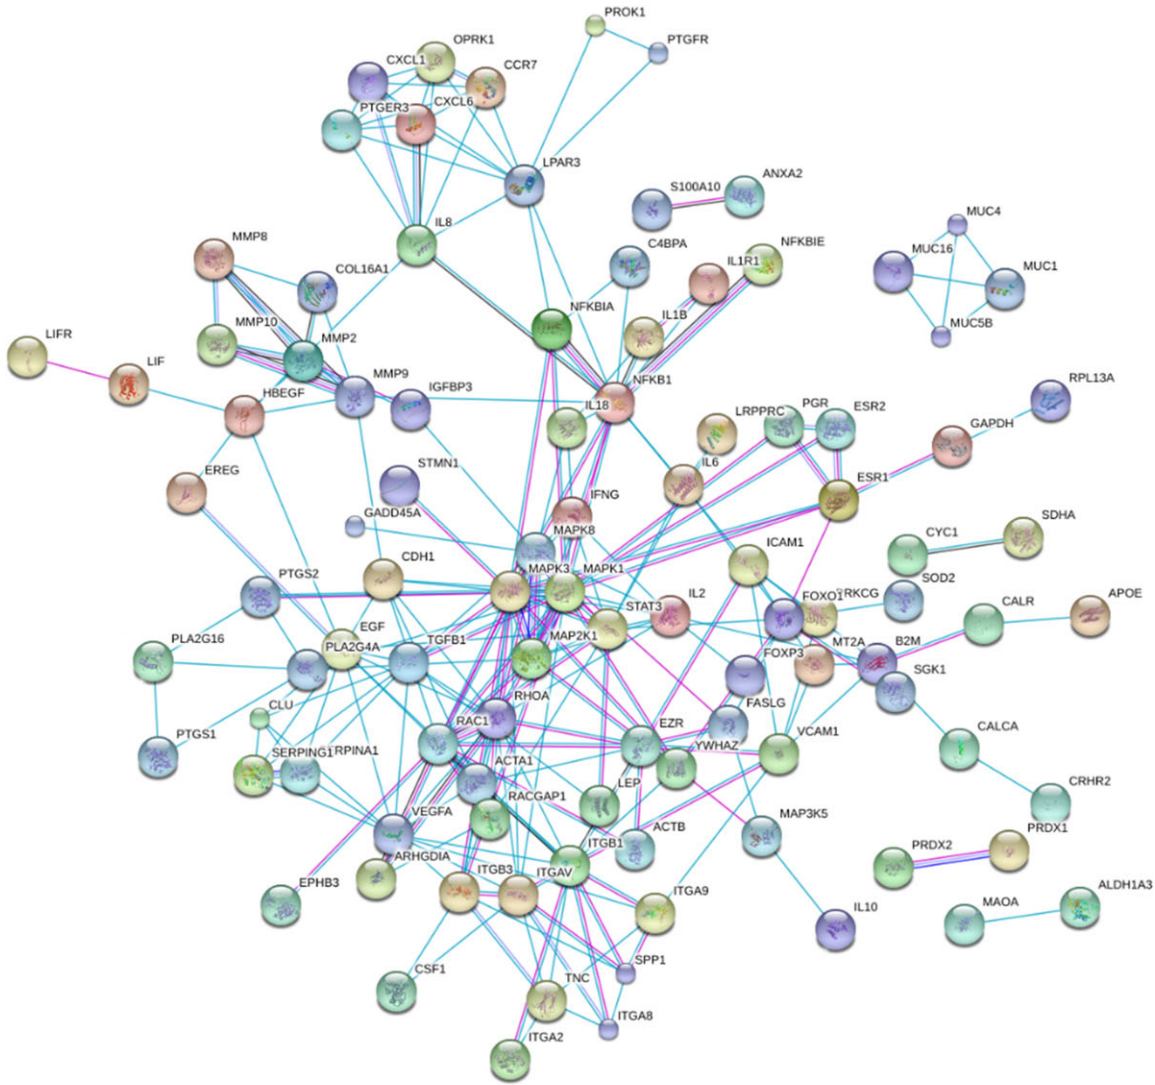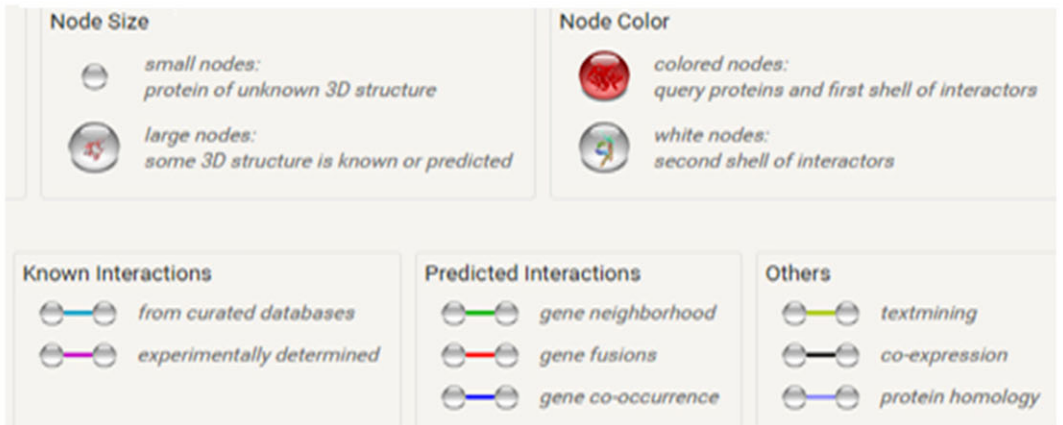

**Supplementary Figure S1** STRING database generated protein interaction network of the proteins codified by the 184 WOI selected genes.
