# Supplementary material for: Development of a new comprehensive and reliable endometrial receptivity map (ER Map/ER Grade) based on RT-qPCR gene expression analysis
Source: Oxford University Press journal article supplement (doi:10.1093/humrep/dex370), 2017-12-01
Supplement: dex370suppl_figure2.pdf [file dex370suppl_figure2.pdf]

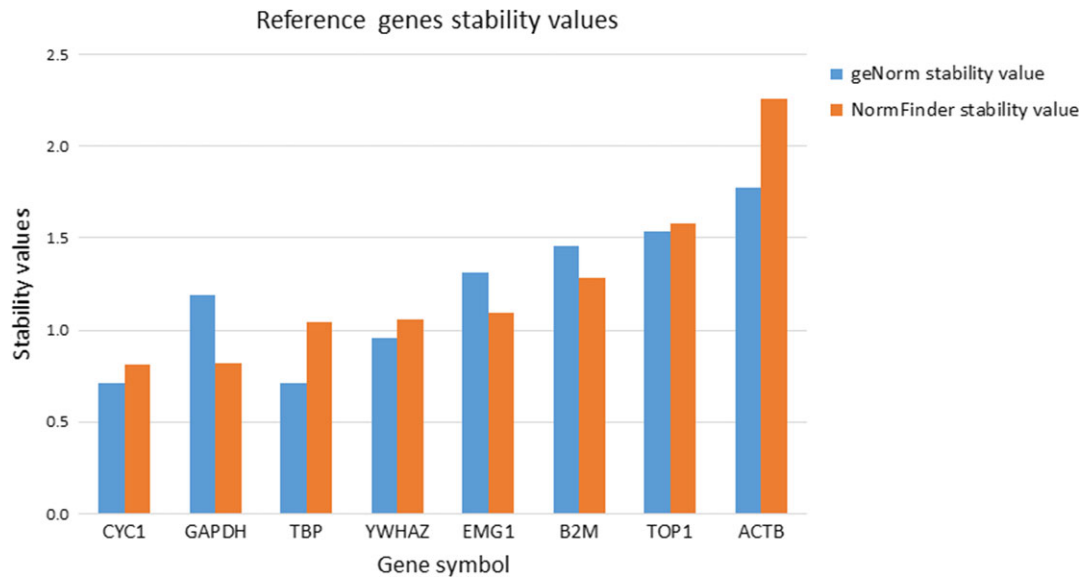

**Supplementary Figure S2** Reference genes stability values. Expression stability values for the eight candidate reference genes selected as determined by geNorm ([Vandesompele et al. 2002](#)) and NormFinder ([Andersen et al. 2004](#)).
