# Supplementary material for: Development of a new comprehensive and reliable endometrial receptivity map (ER Map/ER Grade) based on RT-qPCR gene expression analysis
Source: Oxford University Press journal article supplement (doi:10.1093/humrep/dex370), 2017-12-01
Supplement: dex370suppl_table1.pdf [file dex370suppl_table1.pdf]

**Supplementary Table S1 Panel of genes selected. Selection of 184 genes that may be relevant for the process of endometrial receptivity and the immune response associated to embryo implantation.**

| Gene symbol | Gene name                                                                             | Reference                                     |
|-------------|---------------------------------------------------------------------------------------|-----------------------------------------------|
| ABCC3       | ATP-binding cassette, subfamily C (CFTR/MRP), member 3                                | <a href="#">Díaz-Gimeno et al. (2011)</a>     |
| ACTA1       | Actin, alpha 1, skeletal muscle                                                       | <a href="#">Altmäe et al. (2010)</a>          |
| ALDH1A3     | Aldehyde dehydrogenase 1 family, member A3                                            | <a href="#">Haouzi et al. (2009)</a>          |
| AMIGO2      | Adhesion molecule with Ig-like domain 2                                               | <a href="#">Díaz-Gimeno et al. (2011)</a>     |
| ANGPTL1     | Angiopoietin-like 1                                                                   | <a href="#">Haouzi et al. (2009)</a>          |
| ANXA2       | Annexin A2                                                                            | <a href="#">Dominguez et al. (2009)</a>       |
| ANXA4       | Annexin A4                                                                            | <a href="#">Ponnampalam and Rogers (2006)</a> |
| APOD        | Apolipoprotein D                                                                      | <a href="#">Haouzi et al. (2009)</a>          |
| APOE        | Apolipoprotein E                                                                      | <a href="#">Allegra et al. (2012)</a>         |
| APOL2       | Apolipoprotein L, 2                                                                   | <a href="#">Chen et al. (2015)</a>            |
| AQP3        | Aquaporin 3 (Gill blood group)                                                        | <a href="#">Díaz-Gimeno et al. (2011)</a>     |
| AREG        | Amphiregulin                                                                          | <a href="#">Barnea et al. (2012)</a>          |
| ARG2        | Arginase 2                                                                            | <a href="#">Díaz-Gimeno et al. (2011)</a>     |
| ARHGDI1     | Rho GDP dissociation inhibitor (GDI) alpha                                            | <a href="#">Chen et al. (2009)</a>            |
| ATP5B       | ATP synthase, H <sup>+</sup> transporting, mitochondrial F1 complex, beta polypeptide | <a href="#">Sadek et al. (2012)</a>           |
| BTC         | Betacellulin                                                                          | <a href="#">Barnea et al. (2012)</a>          |
| C10ORF10    | Chromosome 10 open reading frame 10                                                   | <a href="#">Watanabe et al. (2005)</a>        |
| C2CD4B      | C2 calcium-dependent domain containing 4B                                             | <a href="#">Haouzi et al. (2009)</a>          |
| C4BPA       | Complement component 4 binding protein, alpha                                         | <a href="#">Tapia et al. (2011)</a>           |
| CALCA       | Calcitonin-related polypeptide alpha                                                  | <a href="#">Otsuka et al. (2007)</a>          |
| CALR        | Calreticulin                                                                          | <a href="#">Parmar et al. (2009)</a>          |
| CAPN6       | Calpain 6                                                                             | <a href="#">Altmäe et al. (2010)</a>          |
| CATSPERB    | Catsper channel auxiliary subunit beta                                                | <a href="#">Grewal et al. (2008)</a>          |
| CCL2        | Chemokine (C-C motif) ligand 2                                                        | <a href="#">Barnea et al. (2012)</a>          |
| CCR7        | Chemokine (C-C motif) receptor 7                                                      | <a href="#">Altmäe et al. (2010)</a>          |
| CD55        | CD55 molecule, decay accelerating factor for complement (Cromer blood group)          | <a href="#">Mirkin et al. (2005)</a>          |
| CDA         | Cytidine deaminase                                                                    | <a href="#">Díaz-Gimeno et al. (2011)</a>     |
| CDH1        | Cadherin 1, type 1, E-cadherin (epithelial)                                           | <a href="#">Gao et al. (2012)</a>             |
| CIR1        | Corepressor interacting with RBPJ, 1                                                  | <a href="#">Ruiz-Alonso et al. (2012)</a>     |
| CLDN4       | Claudin 4                                                                             | <a href="#">Haouzi et al. (2009)</a>          |
| CLIC1       | Chloride intracellular channel 1                                                      | <a href="#">Chen et al. (2009)</a>            |
| CLU         | Clusterin                                                                             | <a href="#">Teles et al. (2013)</a>           |
| CMTM5       | CKLF-like MARVEL transmembrane domain containing 5                                    | <a href="#">Altmäe et al. (2010)</a>          |
| COL16A1     | Collagen, type XVI, alpha 1                                                           | <a href="#">Hannan et al. (2008)</a>          |
| CRHR2       | Corticotropin releasing hormone receptor 2                                            | <a href="#">Zoumakis et al. (2009)</a>        |
| CRISP3      | Cysteine-rich secretory protein 3                                                     | <a href="#">Díaz-Gimeno et al. (2011)</a>     |
| CSF1        | Colony-stimulating factor 1 (macrophage)                                              | <a href="#">Dimitriadis et al. (2005)</a>     |
| CSF3        | Colony-stimulating factor 3 (granulocyte)                                             | <a href="#">Petitbarat et al. (2011)</a>      |
| CSRP2       | Cysteine and glycine-rich protein 2                                                   | <a href="#">Liu et al. (2008)</a>             |
| CTNNA2      | Catenin (cadherin-associated protein), alpha 2                                        | <a href="#">Altmäe et al. (2010)</a>          |
| CXCL1       | Chemokine (C-X-C motif) ligand 1 (melanoma growth stimulating activity, alpha)        | <a href="#">Hess et al. (2007)</a>            |
| CXCL14      | Chemokine (C-X-C motif) ligand 14                                                     | <a href="#">Mokhtar et al. (2010)</a>         |

Continued

**Supplementary Table S1** *Continued*

| Gene symbol | Gene name                                                               | Reference                                            |
|-------------|-------------------------------------------------------------------------|------------------------------------------------------|
| CXCL6       | Chemokine (C-X-C motif) ligand 6                                        | <a href="#">Altmäe et al. (2010)</a>                 |
| DEFB1       | Dickkopf WNT signaling pathway inhibitor 1                              | <a href="#">Das et al. (2007)</a>                    |
| DKK1        | Dickkopf WNT signaling pathway inhibitor 1                              | <a href="#">Macklon et al. (2008)</a>                |
| EGF         | Epidermal growth factor                                                 | <a href="#">Chobotova et al. (2005)</a>              |
| EPHB3       | EPH receptor B3                                                         | <a href="#">Díaz-Gimeno et al. (2011)</a>            |
| EREG        | Epiregulin                                                              | <a href="#">Barnea et al. (2012)</a>                 |
| ESR1        | Estrogen receptor 1                                                     | <a href="#">Gao et al. (2012)</a>                    |
| ESR2        | Estrogen receptor 2 (ER beta)                                           | <a href="#">Altmäe et al. (2010)</a>                 |
| EZR         | Ezrin                                                                   | <a href="#">Chen et al. (2009)</a>                   |
| FAM3B       | Family with sequence similarity 3, member B                             | <a href="#">Altmäe et al. (2010)</a>                 |
| FAM3D       | Family with sequence similarity 3, member D                             | <a href="#">Altmäe et al. (2010)</a>                 |
| FASLG       | Fas ligand (TNF superfamily, member 6)                                  | <a href="#">Kalantaridou et al. (2007)</a>           |
| FGF7        | Fibroblast growth factor 7                                              | <a href="#">Altmäe et al. (2012)</a>                 |
| FOXO1       | Forkhead box O1                                                         | <a href="#">Grinius et al. (2006)</a>                |
| FOXP3       | Forkhead box P3                                                         | <a href="#">Jasper et al. (2006)</a>                 |
| FUT4        | Fucosyltransferase 4 (alpha (1,3) fucosyltransferase, myeloid-specific) | <a href="#">Ponnampalam and Rogers (2008)</a>        |
| FZD5        | Frizzled family receptor 5                                              | <a href="#">Krikun et al. (2005)</a>                 |
| GABARAPLI   | GABA(A) receptor-associated protein like 1                              | <a href="#">Díaz-Gimeno et al. (2011)</a>            |
| GADD45A     | Growth arrest and DNA-damage-inducible, alpha                           | <a href="#">Díaz-Gimeno et al. (2011)</a>            |
| GAST        | Gastrin                                                                 | <a href="#">Horcajadas et al. (2005)</a>             |
| GDF15       | Growth differentiation factor 15                                        | <a href="#">Díaz-Gimeno et al. (2011)</a>            |
| GJA4        | Gap junction protein, alpha 4, 37 kDa                                   | <a href="#">Ruiz-Alonso et al. (2012)</a>            |
| GNLY        | Granulysin                                                              | <a href="#">Díaz-Gimeno et al. (2011)</a>            |
| GPX3        | Glutathione peroxidase 3 (plasma)                                       | <a href="#">Horcajadas et al. (2008)</a>             |
| HBA1        | Hemoglobin, alpha 1                                                     | <a href="#">Altmäe et al. (2010)</a>                 |
| HBEGF       | Heparin-binding EGF-like growth factor                                  | <a href="#">Aghajanova et al. (2008)<sup>a</sup></a> |
| HBG1        | Hemoglobin, gamma A                                                     | <a href="#">Altmäe et al. (2010)</a>                 |
| HMBS        | Hydroxymethylbilane synthase                                            | <a href="#">Vestergaard et al. (2011)</a>            |
| HOXA10      | Homeobox A10                                                            | <a href="#">Aghajanova et al. (2008b)</a>            |
| HOXA11      | Homeobox A11                                                            | <a href="#">Lynch et al. (2009)</a>                  |
| HOXB7       | Homeobox B7                                                             | <a href="#">Ruiz-Alonso et al. (2012)</a>            |
| HPRT1       | Hypoxanthine phosphoribosyltransferase 1                                | <a href="#">Vestergaard et al. (2011)</a>            |
| HPSE        | Heparanase                                                              | <a href="#">Xu et al. (2007)</a>                     |
| ICAM1       | Intercellular adhesion molecule 1                                       | <a href="#">Zhao et al. (2010)</a>                   |
| ID4         | Inhibitor of DNA binding 4, dominant negative helix-loop-helix protein  | <a href="#">Díaz-Gimeno et al. (2011)</a>            |
| IDH1        | Isocitrate dehydrogenase 1 (NADP+), soluble                             | <a href="#">Díaz-Gimeno et al. (2011)</a>            |
| IER3        | Immediate early response 3                                              | <a href="#">Díaz-Gimeno et al. (2011)</a>            |
| IFNG        | Interferon-gamma                                                        | <a href="#">Labarta et al. (2011)</a>                |
| IGFBP1      | Insulin-like growth factor binding protein 1                            | <a href="#">Fluhr et al. (2006)</a>                  |
| IGFBP3      | Insulin-like growth factor binding protein 3                            | <a href="#">Horcajadas et al. (2008)</a>             |
| IL10        | Interleukin 10                                                          | <a href="#">Otsuka et al. (2007)</a>                 |
| IL11        | Interleukin 11                                                          | <a href="#">Karpovich et al. (2005)</a>              |
| IL15        | Interleukin 15                                                          | <a href="#">Franchi et al. (2008)</a>                |
| IL18        | Interleukin 18 (interferon-gamma-inducing factor)                       | <a href="#">Ledee-Bataille et al. (2005)</a>         |
| IL1B        | Interleukin 1, beta                                                     | <a href="#">Dimitriadis et al. (2005)</a>            |
| IL1RI       | Interleukin 1 receptor, type 1                                          | <a href="#">Bourdieu et al. (2012)</a>               |
| IL2         | Interleukin 2                                                           | <a href="#">Otsuka et al. (2007)</a>                 |

*Continued*

**Supplementary Table S1** *Continued*

| Gene symbol | Gene name                                                                                    | Reference                                 |
|-------------|----------------------------------------------------------------------------------------------|-------------------------------------------|
| IL21        | Interleukin 21                                                                               | <a href="#">Altmäe et al. (2010)</a>      |
| IL4         | Interleukin 4                                                                                | Bersinger et al. (2008)                   |
| IL5         | Interleukin 5 (colony-stimulating factor, eosinophil)                                        | Teklenburg et al. (2010)                  |
| IL6         | Interleukin 6 (interferon, beta 2)                                                           | Otsuka et al. (2007)                      |
| IL8         | Interleukin 8                                                                                | Hess et al. (2007)                        |
| ITGA2       | Integrin, alpha 2 (CD49B, alpha 2 subunit of VLA-2 receptor)                                 | Zhao et al. (2010)                        |
| ITGA8       | Integrin, alpha 8                                                                            | <a href="#">Altmäe et al. (2010)</a>      |
| ITGA9       | Integrin, alpha 9                                                                            | Barnea et al. (2012)                      |
| ITGAV       | Integrin, alpha V                                                                            | Zhao et al. (2010)                        |
| ITGB1       | Integrin, beta 1 (fibronectin receptor, beta polypeptide, antigen CD29 includes MDF2, MSK12) | Zhao et al. (2010)                        |
| ITGB3       | Integrin, beta 3 (platelet glycoprotein IIIa, antigen CD61)                                  | Hannan et al. (2008)                      |
| KCNG1       | Potassium voltage-gated channel, subfamily G, member 1                                       | <a href="#">Díaz-Gimeno et al. (2011)</a> |
| LCPI        | Lymphocyte cytosolic protein 1 (L-plastin)                                                   | Haouzi et al. (2009)                      |
| LEP         | Leptin                                                                                       | Labarta et al. (2011)                     |
| LIF         | Leukemia inhibitory factor                                                                   | Dimitriadis et al. (2006)                 |
| LIFR        | Leukemia inhibitory factor receptor alpha                                                    | Stavreus-Evers et al. (2006)              |
| LPAR3       | Lysophosphatidic acid receptor 3                                                             | Wei et al. (2009)                         |
| LRPPRC      | Leucine-rich PPR-motif containing                                                            | Wanggren et al. (2007)                    |
| LRRC17      | Leucine rich repeat containing 17                                                            | <a href="#">Díaz-Gimeno et al. (2011)</a> |
| LYPD3       | LY6/PLAUR domain containing 3                                                                | <a href="#">Díaz-Gimeno et al. (2011)</a> |
| MAOA        | Monoamine oxidase A                                                                          | <a href="#">Díaz-Gimeno et al. (2011)</a> |
| MAP2K1      | Mitogen-activated protein kinase kinase 1                                                    | Barnea et al. (2012)                      |
| MAP3K5      | Mitogen-activated protein kinase kinase 5                                                    | Tapia et al. (2011)                       |
| MAPK1       | Mitogen-activated protein kinase 1                                                           | <a href="#">Paiva et al. (2011)</a>       |
| MAPK3       | Mitogen-activated protein kinase 3                                                           | Barnea et al. (2012)                      |
| MAPK8       | Mitogen-activated protein kinase 8                                                           | Barnea et al. (2012)                      |
| MFAP5       | Microfibrillar associated protein 5                                                          | Haouzi et al. (2009)                      |
| MMP10       | Matrix metalloproteinase 10 (stromelysin 2)                                                  | Zhao et al. (2010)                        |
| MMP2        | Matrix metalloproteinase 2 (gelatinase A, 72 kDa gelatinase, 72 kDa type IV collagenase)     | Skrzypczak et al. (2007)                  |
| MMP26       | Matrix metalloproteinase 26                                                                  | Pilka et al. (2006)                       |
| MMP8        | Matrix metalloproteinase 8 (neutrophil collagenase)                                          | <a href="#">Altmäe et al. (2010)</a>      |
| MMP9        | Matrix metalloproteinase 9 (gelatinase B, 92 kDa gelatinase, 92 kDa type IV collagenase)     | Skrzypczak et al. (2007)                  |
| MT1E        | Metallothionein 1E                                                                           | Ruiz-Alonso et al. (2012)                 |
| MT1F        | Metallothionein 1F                                                                           | Ruiz-Alonso et al. (2012)                 |
| MT1G        | Metallothionein 1G                                                                           | <a href="#">Díaz-Gimeno et al. (2011)</a> |
| MT1H        | Metallothionein 1H                                                                           | Ruiz-Alonso et al. (2012)                 |
| MT1L        | Metallothionein 1L                                                                           | Ruiz-Alonso et al. (2012)                 |
| MT1X        | Metallothionein 1X                                                                           | Ruiz-Alonso et al. (2012)                 |
| MT2A        | Metallothionein 2A                                                                           | <a href="#">Díaz-Gimeno et al. (2011)</a> |
| MUC1        | Mucin 1, cell surface associated                                                             | Horne et al. (2005)                       |
| MUC16       | Mucin 16, cell surface associated                                                            | Gipson et al. (2008)                      |
| MUC4        | Mucin 4, cell surface associated                                                             | Aghajanova et al. (2008b)                 |
| MUC5B       | Mucin 5B, oligomeric mucus/gel-forming                                                       | <a href="#">Altmäe et al. (2010)</a>      |
| NFKB1       | Nuclear factor of kappa light polypeptide gene enhancer in B-cells 1                         | Barnea et al. (2012)                      |
| NFKBIA      | Nuclear factor of kappa light polypeptide gene enhancer in B-cells inhibitor, alpha          | Barnea et al. (2012)                      |
| NFKBIE      | Nuclear factor of kappa light polypeptide gene enhancer in B-cells inhibitor, epsilon        | Barnea et al. (2012)                      |
| NNMT        | Nicotinamide N-methyltransferase                                                             | Allegra et al. (2009)                     |

*Continued*

**Supplementary Table S1** *Continued*

| Gene symbol | Gene name                                                                               | Reference                                    |
|-------------|-----------------------------------------------------------------------------------------|----------------------------------------------|
| OPRK1       | Opioid receptor, kappa 1                                                                | <a href="#">Díaz-Gimeno et al. (2011)</a>    |
| PAEP        | Progestagen-associated endometrial protein                                              | <a href="#">Stavreus-Evers et al. (2006)</a> |
| PGR         | Progesterone receptor                                                                   | <a href="#">Palomino et al. (2005)</a>       |
| PGRMC1      | Progesterone receptor membrane component 1                                              | <a href="#">Chen et al. (2009)</a>           |
| PLA2G16     | Phospholipase A2, group XVI                                                             | <a href="#">Díaz-Gimeno et al. (2011)</a>    |
| PLA2G4A     | Phospholipase A2, group IVA (cytosolic, calcium-dependent)                              | <a href="#">Achache et al. (2010)</a>        |
| PPP2R2C     | Protein phosphatase 2, regulatory subunit B, gamma                                      | <a href="#">Barnea et al. (2012)</a>         |
| PRDX1       | Peroxiredoxin 1                                                                         | <a href="#">Aghajanova et al. (2008b)</a>    |
| PRDX2       | Peroxiredoxin 2                                                                         | <a href="#">Aghajanova et al. (2008b)</a>    |
| PRKCG       | Protein kinase C, gamma                                                                 | <a href="#">Altmäe et al. (2010)</a>         |
| PROK1       | Prokineticin 1                                                                          | <a href="#">Evans et al. (2008)</a>          |
| PTGER3      | Prostaglandin E receptor 3 (subtype EP3)                                                | <a href="#">Catalano et al. (2011)</a>       |
| PTGFR       | Prostaglandin F receptor (FP)                                                           | <a href="#">Catalano et al. (2011)</a>       |
| PTGS1       | Prostaglandin-endoperoxide synthase 1 (prostaglandin G/H synthase and cyclooxygenase)   | <a href="#">Aghajanova et al. (2008b)</a>    |
| PTGS2       | Prostaglandin-endoperoxide synthase 2 (prostaglandin G/H synthase and cyclooxygenase)   | <a href="#">Aghajanova et al. (2008b)</a>    |
| PTPRZ1      | Protein tyrosine phosphatase, receptor-type, Z polypeptide 1                            | <a href="#">Barnea et al. (2012)</a>         |
| RAC1        | Ras-related C3 botulinum toxin substrate 1 (rho family, small GTP binding protein Rac1) | <a href="#">Grewal et al. (2008)</a>         |
| RACGAP1     | Rac GTPase activating protein 1                                                         | <a href="#">Grewal et al. (2008)</a>         |
| RHOA        | Ras homolog family member A                                                             | <a href="#">Heneweer et al. (2005)</a>       |
| RPL13A      | Ribosomal protein L13a                                                                  | <a href="#">Vestergaard et al. (2011)</a>    |
| S100A1      | S100 calcium binding protein A1                                                         | <a href="#">Otsuka et al. (2007)</a>         |
| S100A10     | S100 calcium binding protein A10                                                        | <a href="#">Haouzi et al. (2009)</a>         |
| S100A2      | S100 calcium binding protein A2                                                         | <a href="#">Altmäe et al. (2010)</a>         |
| S100P       | S100 calcium binding protein P                                                          | <a href="#">Otsuka et al. (2007)</a>         |
| SCGB2A2     | Secretoglobin, family 2A, member 2                                                      | <a href="#">Díaz-Gimeno et al. (2011)</a>    |
| SCGB3A1     | Secretoglobin, family 3A, member 1                                                      | <a href="#">Altmäe et al. (2010)</a>         |
| SDHA        | Succinate dehydrogenase complex, subunit A, flavoprotein (Fp)                           | <a href="#">Vestergaard et al. (2011)</a>    |
| SELL        | Selectin L                                                                              | <a href="#">Lai et al. (2005)</a>            |
| SERPINA1    | Serpin peptidase inhibitor, clade A (alpha-1 antiproteinase, antitrypsin), member 1     | <a href="#">Parmar et al. (2009)</a>         |
| SERPING1    | Serpin peptidase inhibitor, clade G (C1 inhibitor), member 1                            | <a href="#">Díaz-Gimeno et al. (2011)</a>    |
| SGK1        | Serum/glucocorticoid regulated kinase 1                                                 | <a href="#">Feroze-Zaidi et al. (2007)</a>   |
| SLPI        | Secretory leukocyte peptidase inhibitor                                                 | <a href="#">Mirkin et al. (2005)</a>         |
| SOD2        | Superoxide dismutase 2, mitochondrial                                                   | <a href="#">Díaz-Gimeno et al. (2011)</a>    |
| SPDEF       | SAM pointed domain containing ETS transcription factor                                  | <a href="#">Díaz-Gimeno et al. (2011)</a>    |
| SPPI        | Secreted phosphoprotein 1 (osteopontin)                                                 | <a href="#">Mirkin et al. (2005)</a>         |
| STAT3       | Signal transducer and activator of transcription 3 (acute-phase response factor)        | <a href="#">Catalano et al. (2005)</a>       |
| STC1        | Stanniocalcin 1                                                                         | <a href="#">Allegra et al. (2009)</a>        |
| STMN1       | Stathmin 1                                                                              | <a href="#">Dominguez et al. (2009)</a>      |
| TAGLN2      | Transgelin 2                                                                            | <a href="#">Haouzi et al. (2009)</a>         |
| TFF3        | Trefoil factor 3 (intestinal)                                                           | <a href="#">Casado-Vela et al. (2009)</a>    |
| TGFB1       | Transforming growth factor, beta 1                                                      | <a href="#">Skrzypczak et al. (2007)</a>     |
| TNC         | Tenascin                                                                                | <a href="#">Zhao et al. (2010)</a>           |
| TNF         | Tumor necrosis factor                                                                   | <a href="#">Chobotova et al. (2005)</a>      |
| TNFRSF11B   | Tumor necrosis factor receptor superfamily, member 11b                                  | <a href="#">Barnea et al. (2012)</a>         |
| TSPAN8      | Tetraspanin 8                                                                           | <a href="#">Díaz-Gimeno et al. (2011)</a>    |
| VCAM1       | Vascular cell adhesion molecule 1                                                       | <a href="#">Zhao et al. (2010)</a>           |
| VEGFA       | Vascular endothelial growth factor A                                                    | <a href="#">Jee et al. (2009)</a>            |
| WISP2       | WNT1 inducible signaling pathway protein 2                                              | <a href="#">Altmäe et al. (2010)</a>         |

## References

- Achache H, Tsafir A, Prus D, Reich R, Revel A. Defective endometrial prostaglandin synthesis identified in patients with repeated implantation failure undergoing in vitro fertilization. *Fertil Steril* 2010;**94**:1271–1278.
- Aghajanova L, Bjuresten K, Altmäe S, Landgren B-M, Stavreus-Evers A. HB-EGF but not amphiregulin or their receptors HER1 and HER4 is altered in endometrium of women with unexplained infertility. *Reprod Sci* 2008a;**15**:484–492.
- Aghajanova L, Hamilton AE, Giudice LC. Uterine receptivity to human embryonic implantation: histology, biomarkers, and transcriptomics. *Semin Cell Dev Biol* 2008b;**19**:204–211.
- Allegra A, Marino A, Coffaro F, Lama A, Rizza G, Scaglione P, Sammartano F, Santoro A, Volpes A. Is there a uniform basal endometrial gene expression profile during the implantation window in women who became pregnant in a subsequent ICSI cycle? *Hum Reprod* 2009;**24**:2549–2557.
- Allegra A, Marino A, Peregrin PC, Lama A, García-Segovia Á, Forte GI, Nuñez-Calonge R, Agueli C, Mazzola S, Volpes A. Endometrial expression of selected genes in patients achieving pregnancy spontaneously or after ICSI and patients failing at least two ICSI cycles. *Reprod Biomed Online* 2012;**25**:481–491.
- Altmäe S, Martínez-Conejero J a., Salumets A, Simon C, Horcajadas J a., Stavreus-Evers A. Endometrial gene expression analysis at the time of embryo implantation in women with unexplained infertility. *Mol Hum Reprod* 2010;**16**:178–187.
- Altmäe S, Reimand J, Hovatta O, Zhang P, Kere J, Laisk T, Saare M, Peters M, Vilo J, Stavreus-Evers A, et al. Research resource: interactome of human embryo implantation: identification of gene expression pathways, regulation, and integrated regulatory networks. *Mol Endocrinol* 2012;**26**:203–217.
- Barnea ER, Kirk D, Paidas MJ. Preimplantation Factor (PIF) promoting role in embryo implantation: increases endometrial Integrin- $\alpha 2\beta 3$ , amphiregulin and epi-regulin while reducing betacellulin expression via MAPK in decidua. *Reprod Biol Endocrinol* 2012;**10**:50.
- Bersinger NA, Wunder DM, Birkhäuser MH, Mueller MD. Gene expression in cultured endometrium from women with different outcomes following IVF. *Mol Hum Reprod* 2008;**14**:475–484.
- Bourdieu A, Shao R, Rao C V, Akoum A. Human chorionic gonadotropin triggers angiogenesis via the modulation of endometrial stromal cell responsiveness to interleukin 1: a new possible mechanism underlying embryo implantation. *Biol Reprod* 2012;**87**:66.
- Casado-Vela J, Rodríguez-Suarez E, Iloro I, Ametzazurra A, Alkorta N, García-Velasco JA, Matorras R, Prieto B, González S, Nagore D, et al. Comprehensive proteomic analysis of human endometrial fluid aspirate. *J Proteome Res* 2009;**8**:4622–4632.
- Catalano RD, Johnson MH, Campbell EA, Charnock-Jones DS, Smith SK, Sharkey AM. Inhibition of Stat3 activation in the endometrium prevents implantation: a nonsteroidal approach to contraception. *Proc Natl Acad Sci USA* 2005;**102**:8585–8590.
- Catalano RD, Wilson MR, Boddy SC, Jabbour HN. Comprehensive expression analysis of prostanoid enzymes and receptors in the human endometrium across the menstrual cycle. *Mol Hum Reprod* 2011;**17**:182–192.
- Chen JIC, Hannan NJ, Mak Y, Nicholls PK, Zhang J, Rainczuk A, Stanton PG, Robertson DM, Salamonsen LA, Stephens AN. Proteomic characterization of midproliferative and midsecretory human endometrium. *J Proteome Res* 2009;**8**:2032–2044.
- Chen Q, Zhang A, Yu F, Gao J, Liu Y, Yu C, Zhou H, Xu C. Label-free proteomics uncovers energy metabolism and focal adhesion regulations responsive for endometrium receptivity. *J Proteome Res* 2015;**14**:1831–1842.
- Chobotova K, Karpovich N, Carver J, Manek S, Gullick WJ, Barlow DH, Mardon HJ. Heparin-binding epidermal growth factor and its receptors mediate decidualization and potentiate survival of human endometrial stromal cells. *J Clin Endocrinol Metab* 2005;**90**:913–919.
- Das S, Vince GS, Lewis-Jones I, Bates MD, Gazvani R. The expression of human alpha and beta defensin in the endometrium and their effect on implantation. *J Assist Reprod Genet* 2007;**24**:533–539.
- Díaz-Gimeno P, Horcajadas J a, Martínez-Conejero J a, Esteban FJ, Alamá P, Pellicer A, Simón C. A genomic diagnostic tool for human endometrial receptivity based on the transcriptomic signature. *Fertil Steril* 2011;**95**:50–60, 60–15.
- Dimitriadis E, White CA, Jones RL, Salamonsen LA. Cytokines, chemokines and growth factors in endometrium related to implantation. *Hum Reprod Update* 2005;**11**:613–630.
- Dimitriadis E, Stoikos C, Stafford-Bell M, Clark I, Paiva P, Kovacs G, Salamonsen LA. Interleukin-11, IL-11 receptoralpha and leukemia inhibitory factor are dysregulated in endometrium of infertile women with endometriosis during the implantation window. *J Reprod Immunol* 2006;**69**:53–64.
- Domínguez F, Garrido-Gómez T, López JA, Camafeita E, Quiñonero A, Pellicer A, Simón C. Proteomic analysis of the human receptive versus non-receptive endometrium using differential in-gel electrophoresis and MALDI-MS unveils stathmin 1 and annexin A2 as differentially regulated. *Hum Reprod* 2009;**24**:2607–2617.
- Evans J, Catalano RD, Morgan K, Critchley HOD, Millar RP, Jabbour HN. Prokineticin 1 signaling and gene regulation in early human pregnancy. *Endocrinology* 2008;**149**:2877–2887.
- Feroze-Zaidi F, Fusi L, Takano M, Higham J, Salker MS, Goto T, Edassery S, Klingel K, Boini KM, Palmada M, et al. Role and regulation of the serum- and glucocorticoid-regulated kinase 1 in fertile and infertile human endometrium. *Endocrinology* 2007;**148**:5020–5029.
- Fluhr H, Krenzer S, Deperschmidt M, Zwirner M, Wallwiener D, Licht P. Human chorionic gonadotropin inhibits insulin-like growth factor-binding protein-1 and prolactin in decidualized human endometrial stromal cells. *Fertil Steril* 2006;**86**:236–238.
- Franchi A, Zaret J, Zhang X, Bocca S, Oehninger S. Expression of immunomodulatory genes, their protein products and specific ligands/receptors during the window of implantation in the human endometrium. *Mol Hum Reprod* 2008;**14**:413–421.
- Gao R, Ding Y, Liu X, Chen X, Wang Y, Long C, Li S, Guo L, He J. Effect of folate deficiency on promoter methylation and gene expression of Esr1, Cdh1 and Pgr, and its influence on endometrial receptivity and embryo implantation. *Hum Reprod* 2012;**27**:2756–2765.
- Gipson IK, Blalock T, Tisdale A, Spurr-Michaud S, Allcorn S, Stavreus-Evers A, Gemzell K. MUC16 is lost from the uterodome (pinopode) surface of the receptive human endometrium: in vitro evidence that MUC16 is a barrier to trophoblast adherence. *Biol Reprod* 2008;**78**:134–142.
- Grewal S, Carver JG, Ridley AJ, Mardon HJ. Implantation of the human embryo requires Rac1-dependent endometrial stromal cell migration. *Proc Natl Acad Sci USA* 2008;**105**:16189–16194.

- Grinius L, Kessler C, Schroeder J, Handwerger S. Forkhead transcription factor FOXO1A is critical for induction of human decidualization. *J Endocrinol* 2006;**189**:179–187.
- Hannan NJ, Salamonsen LA. CX3CLI and CCL14 regulate extracellular matrix and adhesion molecules in the trophoblast: potential roles in human embryo implantation. *Biol Reprod* 2008;**79**:58–65.
- Haouzi D, Mahmoud K, Fourar M, Bendhaou K, Dechaud H, Vos J De, Rème T, Dewailly D, Hamamah S. Identification of new biomarkers of human endometrial receptivity in the natural cycle. *Hum Reprod* 2009;**24**:198–205.
- Heneweer C, Schmidt M, Denker HW, Thie M. Molecular mechanisms in uterine epithelium during trophoblast binding: the role of small GTPase RhoA in human uterine Ishikawa cells. *J Exp Clin Assist Reprod* 2005;**2**:4.
- Hess AP, Hamilton AE, Talbi S, Dosiou C, Nyegaard M, Nayak N, Genbecev-Krtolica O, Mavrogianis P, Ferrer K, Krussel J, et al. Decidual stromal cell response to paracrine signals from the trophoblast: amplification of immune and angiogenic modulators. *Biol Reprod* 2007;**76**:102–117.
- Horcajadas JA, Riesewijk A, Polman J, Os R van, Pellicer A, Mosselman S, Simón C. Effect of controlled ovarian hyperstimulation in IVF on endometrial gene expression profiles. *Mol Hum Reprod* 2005;**11**:195–205.
- Horcajadas JA, Mínguez P, Dopazo J, Esteban FJ, Domínguez F, Giudice LC, Pellicer A, Simón C. Controlled ovarian stimulation induces a functional genomic delay of the endometrium with potential clinical implications. *J Clin Endocrinol Metab* 2008;**93**:4500–4510.
- Horne AW, Lalani EN, Margara RA, Ryder TA, Mobberley MA, White JO. The expression pattern of MUC1 glycoforms and other biomarkers of endometrial receptivity in fertile and infertile women. *Mol Reprod Dev* 2005;**72**:216–229.
- Jasper MJ, Tremellen KP, Robertson SA. Primary unexplained infertility is associated with reduced expression of the T-regulatory cell transcription factor Foxp3 in endometrial tissue. *Mol Hum Reprod* 2006;**12**:301–308.
- Jee BC, Suh CS, Kim KC, Lee WD, Kim H, Kim SH, Ai. E. Expression of vascular endothelial growth factor-A and its receptor-1 in a luteal endometrium in patients with repeated in vitro fertilization failure. *Fertil Steril* 2009;**91**:528–534.
- Kalantaridou SN, Zoumakis E, Weil S, Lavasidis LG, Chrousos GP, Makrigrannakis A. Reproductive corticotropin releasing hormone, implantation, and fetal immunotolerance. *Crit Rev Clin Lab Sci* 2007;**44**:461–481.
- Karpovich N, Klemmt P, Jung HH, McVeigh JE, Heath JK, Barlow DH, Mardon HJ. The production of interleukin-11 and decidualization are compromised in endometrial stromal cells derived from patients with infertility. *J Clin Endocrinol Metab* 2005;**90**:1607–1612.
- Krikun G, Schatz F, Taylor R, Critchley HOD, Rogers PA, Huang J, Lockwood CJ. Endometrial endothelial cell steroid receptor expression and steroid effects on gene expression. *J Clin Endocrinol Metab* 2005;**90**:1812–1818.
- Labarta E, Martínez-Conejero JA, Alamá P, Horcajadas JA, Pellicer A, Simón C, Bosch E. Endometrial receptivity is affected in women with high circulating progesterone levels at the end of the follicular phase: a functional genomics analysis. *Hum Reprod* 2011;**26**:1813–1825.
- Lai TH, Shih IM, Vlahos N, Ho CL, Wallach E, Zhao Y. Differential expression of L-selectin ligand in the endometrium during the menstrual cycle. *Fertil Steril* 2005;**83**:1297–1302.
- Lédée-Bataille N, Bonnet-Chea K, Hosny G, Dubanchet S, Frydman R, Chaouat G, al. et. Role of the endometrial tripod interleukin-18, -15, and -12 in inadequate uterine receptivity in patients with a history of repeated in vitro fertilization-embryo transfer failure. *Fertil Steril* 2005;**83**:598–605.
- Liu Y, Lee K-FF, Ng EHY, Yeung WSB, Ho P-CC, Chaouat G, al. et. Gene expression profiling of human peri-implantation endometria between natural and stimulated cycles. *Fertil Steril* 2008;**90**:2152–2164.
- Lynch VJ, Brayer K, Gellersen B, Wagner GP. HoxA-11 and FOXO1A cooperate to regulate decidual prolactin expression: towards inferring the core transcriptional regulators of decidual genes. In Dey SK, editor. *PLoS One* 2009;**4**:e6845.
- Macklon NS, Gaast MH van der, Hamilton A, Fauser BCJM, Giudice LC. The impact of ovarian stimulation with recombinant FSH in combination with GnRH antagonist on the endometrial transcriptome in the window of implantation. *Reprod Sci* 2008;**15**:357–365.
- Mirkin S, Arslan M, Churikov D, Corica A, Diaz JJ, Williams S, Bocca S, Oehninger S. In search of candidate genes critically expressed in the human endometrium during the window of implantation. *Hum Reprod* 2005;**20**:2104–2117.
- Mokhtar NM, Cheng CW, Cook E, Bielby H, Smith SK, Stephen Charnock-Jones D. Progesterin regulates chemokine (C-X-C motif) ligand 14 transcript level in human endometrium. *Mol Hum Reprod* 2009;**16**:170–177.
- Otsuka AY, Andrade PM, Villanova FE, Borra RC, Silva IDCG. Human endometrium mRNA profile assessed by oligonucleotide three-dimensional microarray. *Gynecol Endocrinol* 2007;**23**:527–534.
- Paiva P, Hannan NJ, Hincks C, Meehan KL, Pruyers E, Dimitriadis E, Salamonsen LA. Human chorionic gonadotrophin regulates FGF2 and other cytokines produced by human endometrial epithelial cells, providing a mechanism for enhancing endometrial receptivity. *Hum Reprod* 2011;**26**:1153–1162.
- Palomino WA, Fuentes A, González RR, Gabler F, Boric MA, Vega M, Devoto L. Differential expression of endometrial integrins and progesterone receptor during the window of implantation in normo-ovulatory women treated with clomiphene citrate. *Fertil Steril* 2005;**83**:587–593.
- Parmar T, Gadkar-Sable S, Savardekar L, Katkam R, Dharma S, Meherji P, Puri CP, Sachdeva G. Protein profiling of human endometrial tissues in the midsecretory and proliferative phases of the menstrual cycle. *Fertil Steril* 2009;**92**:1091–1103.
- Petitbarat M, Rahmati M, Sérazin V, Dubanchet S, Morvan C, Wainer R, Mazancourt P de, Chaouat G, Foidart JM, Munaut C, et al. TWEAK appears as a modulator of endometrial il-18 related cytotoxic activity of uterine natural killers. In Khoury J El, editor. *PLoS One* 2011;**6**:e14497.
- Pilka R, Oborna I, Lichnovsky V, Havelka P, Fingerova H, Eriksson P, Hansson S, Casslén B. Endometrial expression of the estrogen-sensitive genes MMP-26 and TIMP-4 is altered by a substitution protocol without down-regulation in IVF patients. *Hum Reprod* 2006;**21**:3146–3156.
- Ponnampalam AP, Rogers PAW. Cyclic changes and hormonal regulation of annexin IV mRNA and protein in human endometrium. *Mol Hum Reprod* 2006;**12**:661–669.
- Ponnampalam AP, Rogers PAW. Expression and regulation of fucosyltransferase 4 in human endometrium. *Reproduction* 2008;**136**:117–123.



- Ruiz-Alonso M, Blesa D, Simón C. The genomics of the human endometrium. *Biochim Biophys Acta - Mol Basis Dis* 2012; **1822**:1931–1942.
- Sadek KH, Cagampang FR, Bruce KD, Shreeve N, Macklon N, Cheong Y. Variation in stability of housekeeping genes in endometrium of healthy and polycystic ovarian syndrome women. *Hum Reprod* 2012; **27**:251–256.
- Skrzypczak J, Wirstlein P, Mikołajczyk M, Ludwikowski G, Zak T. TGF superfamily and MMP2, MMP9, TIMP1 genes expression in the endometrium of women with impaired reproduction. *Folia Histochem Cytobiol* 2007; **45**:143–148.
- Stavreus-Evers A, Mandelin E, Koistinen R, Aghajanova L, Hovatta O, Seppälä M. Glycodelin is present in pinopodes of receptive-phase human endometrium and is associated with down-regulation of progesterone receptor B. *Fertil Steril* 2006; **85**:1803–1811.
- Tapia A, Vilos C, Marín JC, Croxatto HB, Devoto L. Bioinformatic detection of E47, E2F1 and SREBP1 transcription factors as potential regulators of genes associated to acquisition of endometrial receptivity. *Reprod Biol Endocrinol* 2011; **9**:14.
- Teklenburg G, Salker M, Molokhia M, Lavery S, Trew G, Aojanepong T, Mardon HJ, Lokugamage AU, Rai R, Landles C, et al. Natural selection of human embryos: Decidualizing endometrial stromal cells serve as sensors of embryo quality upon implantation. In Vitzthum VJ, editor. *PLoS One* 2010; **5**:e10258.
- Teles A, Schumacher A, Kühnle MC, Linzke N, Thuere C, Reichardt P, Tadokoro CE, Hämmerling GJ, Zenclussen AC. Control of uterine microenvironment by Foxp3+ cells facilitates embryo implantation. *Front Immunol* 2013; **4**:158.
- Vestergaard AL, Knudsen UB, Munk T, Rosbach H, Martensen PM. Transcriptional expression of type-I interferon response genes and stability of housekeeping genes in the human endometrium and endometriosis. *MHR Basic Sci Reprod Med* 2011; **17**:243–254.
- Wanggren K, Lalitkumar PG, Hambiliki F, Stabi B, Gemzell-Danielsson K, Stavreus-Evers A. Leukaemia inhibitory factor receptor and gp130 in the human Fallopian tube and endometrium before and after mifepristone treatment and in the human preimplantation embryo. *Mol Hum Reprod* 2007; **13**:391–397.
- Watanabe H, Nonoguchi K, Sakurai T, Masuda T, Itoh K, Fujita J. A novel protein Depp, which is induced by progesterone in human endometrial stromal cells activates Elk-1 transcription factor. *Mol Hum Reprod* 2005; **11**:471–476.
- Wei Q, Clair JB St., Fu T, Stratton P, Nieman LK. Reduced expression of biomarkers associated with the implantation window in women with endometriosis. *Fertil Steril* 2009; **91**:1686–1691.
- Xu X, Ding J, Rao G, Shen J, Prinz RA, Rana N, Dmowski WP. Estradiol induces heparanase-I expression and heparan sulphate proteoglycan degradation in human endometrium. *Hum Reprod* 2007; **22**:927–937.
- Zhao Y, Garcia J, Kolp L, Cheadle C, Rodriguez A, Vlahos NF. The impact of luteal phase support on gene expression of extracellular matrix protein and adhesion molecules in the human endometrium during the window of implantation following controlled ovarian stimulation with a GnRH antagonist protocol. *Fertil Steril* 2010; **94**:2264–2271.
- Zoumakis E, Kalantaridou SN, Makrigiannakis A. CRH-like peptides in human reproduction. *Curr Med Chem* 2009; **16**:4230–4235.
