# Supplementary material for: Development of a new comprehensive and reliable endometrial receptivity map (ER Map/ER Grade) based on RT-qPCR gene expression analysis
Source: Oxford University Press journal article supplement (doi:10.1093/humrep/dex370), 2017-12-01
Supplement: dex370suppl_table2.pdf [file dex370suppl_table2.pdf]

**Supplementary Table SII GO functional enrichment of the 184 WOI genes. Number of genes, percentage of genes belonging to each category and P-value are indicated.**

| Category | Term                                         | Genes | %    | P-value |
|----------|----------------------------------------------|-------|------|---------|
| BP       | Regulation of cell proliferation             | 47    | 24.6 | 9.0E-19 |
| BP       | Positive regulation of cell proliferation    | 33    | 17.3 | 1.6E-16 |
| BP       | Response to wounding                         | 35    | 18.3 | 5.1E-15 |
| BP       | Defense response                             | 36    | 18.8 | 6.8E-14 |
| BP       | Positive regulation of immune system process | 23    | 12.0 | 3.9E-13 |
| BP       | Negative regulation of transport             | 18    | 9.4  | 1.4E-12 |
| MF       | Cytokine activity                            | 30    | 15.7 | 3.7E-23 |
| MF       | Growth factor activity                       | 23    | 12.0 | 6.0E-17 |
| MF       | Cadmium ion binding                          | 5     | 2.6  | 4.9E-6  |
| MF       | Antioxidant activity                         | 7     | 3.7  | 2.6E-5  |
| CC       | Extracellular region part                    | 65    | 34   | 6.3E-30 |
| CC       | Extracellular space                          | 55    | 28.8 | 2.0E-28 |

BP, biological process; MF, molecular function; CC, cellular component.
