# Supplementary material for: Development of a new comprehensive and reliable endometrial receptivity map (ER Map/ER Grade) based on RT-qPCR gene expression analysis
Source: Oxford University Press journal article supplement (doi:10.1093/humrep/dex370), 2017-12-01
Supplement: dex370suppl_table3.pdf [file dex370suppl_table3.pdf]

**Supplementary Table SIII GO functional enrichment of the 85 differentially expressed genes between LH + 2 and LH + 7. Number of genes, percentage of genes belonging to each category and P-value are indicated.**

|    | <b>Term</b>                                                      | <b>Count</b> | <b>%</b> | <b>P-value</b> | <b>Fold enrichment</b> |
|----|------------------------------------------------------------------|--------------|----------|----------------|------------------------|
| BP | Negative regulation of growth                                    | 7            | 8.3      | 2.70E-10       | 75.4                   |
| BP | Cellular response to zinc ion                                    | 7            | 8.3      | 2.70E-10       | 75.4                   |
| BP | Cellular response to cadmium ion                                 | 5            | 6        | 1.10E-06       | 60.2                   |
| BP | Extracellular matrix organization                                | 9            | 10.7     | 4.60E-06       | 9.4                    |
| BP | Embryo implantation                                              | 5            | 6        | 4.90E-05       | 24.4                   |
| BP | Positive regulation of nitric oxide biosynthetic process         | 5            | 6        | 5.40E-05       | 23.8                   |
| BP | Membrane to membrane docking                                     | 3            | 3.6      | 2.30E-04       | 122.9                  |
| BP | Leukocyte cell-cell adhesion                                     | 4            | 4.8      | 2.30E-04       | 32.8                   |
| BP | Negative regulation of apoptotic process                         | 10           | 11.9     | 3.40E-04       | 4.5                    |
| BP | Positive regulation of cell division                             | 4            | 4.8      | 1.50E-03       | 17.4                   |
| BP | Positive regulation of p38MAPK cascade                           | 3            | 3.6      | 2.60E-03       | 38.4                   |
| BP | Protein homotetramerization                                      | 4            | 4.8      | 3.00E-03       | 13.7                   |
| BP | Response to vitamin D                                            | 3            | 3.6      | 3.30E-03       | 34.1                   |
| BP | Cell chemotaxis                                                  | 4            | 4.8      | 3.80E-03       | 12.6                   |
| BP | Regulation of blood pressure                                     | 4            | 4.8      | 3.80E-03       | 12.6                   |
| BP | Interferon-gamma-mediated signaling pathway                      | 4            | 4.8      | 4.90E-03       | 11.5                   |
| BP | Cellular response to vascular endothelial growth factor stimulus | 3            | 3.6      | 5.40E-03       | 26.7                   |
| BP | Extracellular matrix disassembly                                 | 4            | 4.8      | 5.90E-03       | 10.8                   |
| BP | Extracellular space                                              | 33           | 39.3     | 7.30E-16       | 5.4                    |
| CC | Extracellular region                                             | 31           | 36.9     | 4.40E-12       | 4.2                    |
| CC | Perinuclear region of cytoplasm                                  | 14           | 16.7     | 3.80E-06       | 4.9                    |
| CC | Extracellular exosome                                            | 29           | 34.5     | 2.10E-05       | 2.3                    |
| CC | Proteinaceous extracellular matrix                               | 7            | 8.3      | 1.30E-03       | 5.7                    |
| CC | Cell surface                                                     | 9            | 10.7     | 3.00E-03       | 3.6                    |
| CC | Immunological synapse                                            | 3            | 3.6      | 1.00E-02       | 19.4                   |
| CC | External side of plasma membrane                                 | 5            | 6        | 1.60E-02       | 5.2                    |
| CC | Vesicle                                                          | 4            | 4.8      | 2.00E-02       | 6.9                    |
| MF | Growth factor activity                                           | 7            | 8.3      | 1.20E-04       | 9                      |
| MF | Cytokine activity                                                | 6            | 7.1      | 1.50E-03       | 7.1                    |
| MF | S100 protein binding                                             | 3            | 3.6      | 1.70E-03       | 48.1                   |
| MF | Calcium-dependent protein binding                                | 4            | 4.8      | 2.60E-03       | 14.4                   |
| MF | Cell adhesion molecule binding                                   | 4            | 4.8      | 3.20E-03       | 13.4                   |
| MF | Integrin binding                                                 | 4            | 4.8      | 1.40E-02       | 7.9                    |
| MF | Receptor binding                                                 | 6            | 7.1      | 2.60E-02       | 3.5                    |
| MF | Primary amine oxidase activity                                   | 2            | 2.4      | 2.80E-02       | 69.5                   |
| MF | Calcium-dependent phospholipid binding                           | 3            | 3.6      | 3.10E-02       | 10.8                   |
| MF | Small molecule binding                                           | 2            | 2.4      | 3.30E-02       | 59.5                   |
| MF | ATPase binding                                                   | 3            | 3.6      | 4.80E-02       | 8.4                    |
| MF | Zinc ion binding                                                 | 11           | 13.1     | 4.90E-02       | 2                      |
| MF | Phospholipase inhibitor activity                                 | 2            | 2.4      | 5.10E-02       | 37.9                   |
| MF | Protein binding                                                  | 50           | 59.5     | 6.10E-02       | 1.2                    |
| MF | Hormone activity                                                 | 3            | 3.6      | 7.30E-02       | 6.7                    |
| MF | Peroxidase activity                                              | 2            | 2.4      | 9.90E-02       | 18.9                   |
